# Supplementary material for: Alcohol-Induced Liver Injury Is Modulated by Nlrp3 and Nlrc4 Inflammasomes in Mice
Source: Hindawi journal article supplement (doi:10.1155/2013/751374), 2013-01-01
Supplement: f1 [file 751374.f1.pdf]

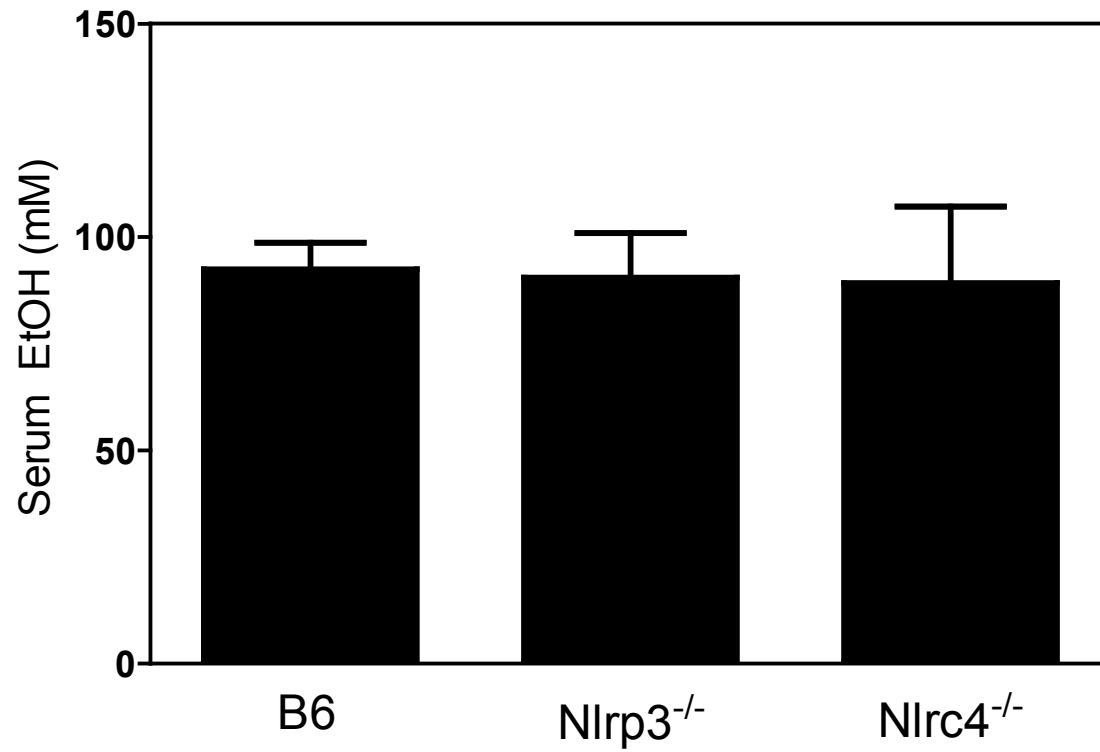

| <b>Gene</b>   | <b>Forward Primer</b>  | <b>Reverse Primer</b>    |
|---------------|------------------------|--------------------------|
| $\alpha$ -SMA | 5'ctgacagaggcaccactgaa | 5'agaggcatagaggacagca    |
| Nlrc4         | 5'aattcagatgggcagacagg | 5'tcacctgaagctccacctct   |
| Nlrp3         | 5'attacccgcccagaaaagg  | 5'catgagtgtggctagatccaag |
| Naip5         | 5'tgcagctgactctctctcca | 5'gatgcacaaccacatcaagg   |
| MCP-1         | 5'aggccctgtcatgcttctg  | 5'cgtaactgcatctggctga    |
| 18S rRNA      | 5'ccatccaatcggtagtagcg | 5'gtaaccggtgaacccatt     |
